# Supplementary material for: Effects of Combined Use of Olive Mill Waste Compost and Sprinkler Irrigation on GHG Emissions and Net Ecosystem Carbon Budget under Different Tillage Systems
Source: MDPI journal article supplement (doi:10.3390/plants11243454), 2022-12-09
Supplement: s1 [file s1]

## SUPPLEMENTARY TABLE

**Table S1.** Effects of different management systems on soil physicochemical properties (0–20 cm depth).

|             | TOC<br>(g kg <sup>-1</sup> ) | WSOC<br>(mg kg <sup>-1</sup> ) | FA<br>(g kg <sup>-1</sup> ) | HA<br>(g kg <sup>-1</sup> ) | HI       | EC<br>(dS m <sup>-1</sup> ) | pH      | N<br>(g kg <sup>-1</sup> ) | P<br>(mg kg <sup>-1</sup> ) |
|-------------|------------------------------|--------------------------------|-----------------------------|-----------------------------|----------|-----------------------------|---------|----------------------------|-----------------------------|
| <b>2015</b> |                              |                                |                             |                             |          |                             |         |                            |                             |
| DS          | 10.2 aA                      | 210 bA                         | 1.10 bC                     | 1.62 bB                     | 15.9 cB  | 2.14 aA                     | 5.77 bA | 0.725 aA                   | 34.5 aB                     |
| DSC         | 21.3 cC                      | 448 cA                         | 1.29 cB                     | 2.35 dB                     | 11.0 aB  | 3.69 bAB                    | 6.58 dB | 1.82 bA                    | 38.3 bB                     |
| T           | 10.7 aA                      | 137 aA                         | 0.965 aA                    | 1.34 aB                     | 12.5 abB | 3.74 bB                     | 5.64 aB | 0.805 aA                   | 34.9 aA                     |
| TC          | 15.6 bA                      | 497 dB                         | 1.29 cC                     | 2.02 cB                     | 12.9 bB  | 4.19 cB                     | 5.99 cA | 1.53 bA                    | 35.7 aA                     |
| <b>2016</b> |                              |                                |                             |                             |          |                             |         |                            |                             |
| DS          | 9.99 aA                      | 309 aB                         | 0.810 aA                    | 1.14 aA                     | 11.4 cA  | 2.49 cA                     | 5.86 bB | 1.52 aB                    | 37.0 aC                     |
| DSC         | 16.5 cA                      | 533 bA                         | 0.929 aA                    | 1.35 abA                    | 8.16 aA  | 3.63 dB                     | 6.42 cA | 2.37 cA                    | 40.8 abB                    |
| T           | 11.3 bA                      | 335 aB                         | 0.920 aA                    | 1.17 aA                     | 10.3 bcA | 2.21 aA                     | 5.41 aA | 1.59 aB                    | 40.9 abC                    |
| TC          | 17.4 dB                      | 519 bB                         | 0.761 aA                    | 1.59 bA                     | 9.14 abA | 2.40 bA                     | 6.56 dC | 2.15 bB                    | 43.4 bB                     |
| <b>2017</b> |                              |                                |                             |                             |          |                             |         |                            |                             |
| DS          | 15.1 bB                      | 316 aC                         | 0.946 aB                    | 1.44 aAB                    | 9.53 aA  | 3.96 bB                     | 6.08 bC | 1.81 bC                    | 30.1 aA                     |
| DSC         | 19.1 dB                      | 498 bA                         | 1.24 cB                     | 2.24 bB                     | 11.7 bC  | 3.44 aA                     | 6.61 dB | 2.38 dA                    | 34.6 bA                     |
| T           | 13.1 aB                      | 336 aB                         | 1.48 dB                     | 1.55 aC                     | 11.9 bB  | 4.62 cC                     | 5.61 aB | 1.67 aB                    | 36.9 cB                     |
| TC          | 18.2 cB                      | 395 aA                         | 1.13 bB                     | 2.40 bC                     | 13.2 cB  | 3.73 abB                    | 6.35 cB | 2.24 cB                    | 36.8 cA                     |
| Y           | 123***                       | 9.76**                         | 108***                      | 92.2***                     | 67.2***  | 156***                      | 39.8*** | 75.1***                    | 39.2***                     |
| T           | 1020***                      | 32.5***                        | 17.3**                      | 64.2***                     | 9.92**   | 31.8***                     | 580***  | 53.2***                    | 17.7**                      |
| Y×T         | 60.7***                      | 3.89*                          | 22.2***                     | 10.2***                     | 19.4***  | 55.3***                     | 49.6*** | 1.36NS                     | 4.04*                       |

Rice cultivated by, DS: direct seeding; DSC: direct seeding compost; T: Tillage; TC: Tillage compost. TOC: Total Organic Carbon; WSOC: Water Soluble Organic Carbon; FA: Fulvic Acid; HA: Humic Acid; HI: Humification index; EC: Electrical Conductivity; N: Total Nitrogen; P: Available Phosphorus. ANOVA factors are Y: Year; T: Treatment; Y × T: Interaction Year \* Treatment. F-values indicate the significance levels \*  $p < 0.05$ ; \*\*  $p < 0.01$ ; \*\*\*  $p < 0.001$ , respectively, and NS: not significant. Different letters indicate differences ( $p < 0.05$ ) between treatments in the same year (lower case letters) and between years within the same treatment (upper case letters).

**Table S2.** Effects of different management systems on soil enzyme activities (0–10 cm depth).

|             | DH<br>( $\mu\text{g INTF g}^{-1} \text{ h}^{-1}$ ) | GL<br>( $\mu\text{mol pNP g}^{-1} \text{ h}^{-1}$ ) | UR<br>( $\mu\text{g NH}_4^+ \text{ g}^{-1} \text{ h}^{-1}$ ) | PHO<br>( $\mu\text{mol pNP g}^{-1} \text{ h}^{-1}$ ) | ARS<br>( $\mu\text{g pNP g}^{-1} \text{ h}^{-1}$ ) |
|-------------|----------------------------------------------------|-----------------------------------------------------|--------------------------------------------------------------|------------------------------------------------------|----------------------------------------------------|
| <b>2015</b> |                                                    |                                                     |                                                              |                                                      |                                                    |
| DS          | 0.993 aA                                           | 0.210 aA                                            | 17.7 aA                                                      | 1.46 aA                                              | 9.96 abA                                           |
| DSC         | 1.89 bB                                            | 0.980 bA                                            | 45.2 bA                                                      | 1.28 aAB                                             | 7.34 aA                                            |
| T           | 1.06 aB                                            | 0.233 aB                                            | 17.7 aA                                                      | 1.23 aA                                              | 7.98 aA                                            |
| TC          | 1.35 abA                                           | 1.20 bA                                             | 26.1 aA                                                      | 1.30 aA                                              | 14.5 bA                                            |
| <b>2016</b> |                                                    |                                                     |                                                              |                                                      |                                                    |
| DS          | 0.663 abA                                          | 0.157 aA                                            | 19.9 abA                                                     | 1.59 aA                                              | 13.1 aA                                            |
| DSC         | 1.13 cAB                                           | 2.33 bA                                             | 28.5 bA                                                      | 1.67 aB                                              | 16.2 aB                                            |
| T           | 0.510 aA                                           | 0.117 aA                                            | 8.00 aA                                                      | 1.56 aB                                              | 14.0 aA                                            |
| TC          | 0.877 abA                                          | 1.12 aA                                             | 20.6 abA                                                     | 1.57 aA                                              | 15.0 aA                                            |
| <b>2017</b> |                                                    |                                                     |                                                              |                                                      |                                                    |
| DS          | 0.713 abA                                          | 0.077 aA                                            | 13.9 aA                                                      | 1.41 aA                                              | 9.16 aA                                            |
| DSC         | 1.09 bA                                            | 1.48 bA                                             | 27.7 bA                                                      | 1.20 aA                                              | 20.4 bC                                            |
| T           | 0.333 aA                                           | 0.093 aA                                            | 9.23 aA                                                      | 1.40 aAB                                             | 10.4 aA                                            |
| TC          | 0.827 bA                                           | 0.890 abA                                           | 25.9 bA                                                      | 1.41 aA                                              | 19.4 bA                                            |
| Y           | 23.2***                                            | 2.76NS                                              | 6.33**                                                       | 8.24**                                               | 8.49**                                             |
| T           | 5.11*                                              | 13.29**                                             | 12.9**                                                       | 1.23NS                                               | 8.94**                                             |
| YxT         | 0.882NS                                            | 3.32*                                               | 2.02NS                                                       | 0.749NS                                              | 3.22*                                              |

Rice cultivated by, DS: direct seeding; DSC: direct seeding compost; T: Tillage, and TC: Tillage compost. DH: Dehydrogenase Activity; GL: B-Glucosidase Activity; UR: Urease Activity; PHO: Phosphatase Activity; ARS: Arylsulfatase Activity. ANOVA factors are Y: Year; T: Treatment; Y x T: Interaction Year \* Treatment. F-values indicate the significance levels \*  $p < 0.05$ ; \*\*  $p < 0.01$ ; \*\*\*  $p < 0.001$ , respectively, and NS: not significant. Different letters indicate differences ( $p < 0.05$ ) between treatments in the same year (lower case letters) and between years within the same treatment (upper case letters).
